# Supplementary material for: Super Enhancer Regulatory Gene FYB1 Promotes the Progression of T Cell Acute Lymphoblastic Leukemia by Activating IGLL1
Source: Hindawi journal article supplement (doi:10.1155/2023/3804605), 2023-09-19

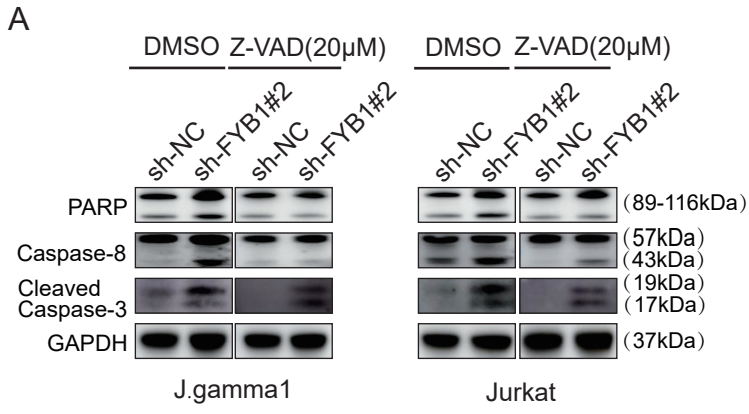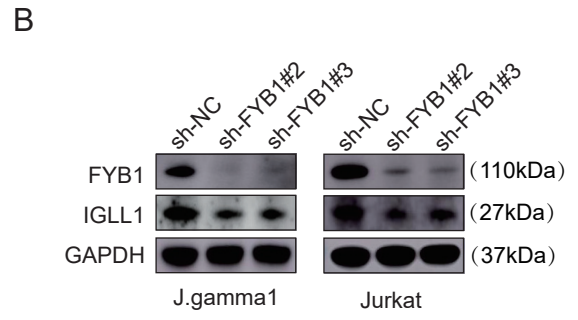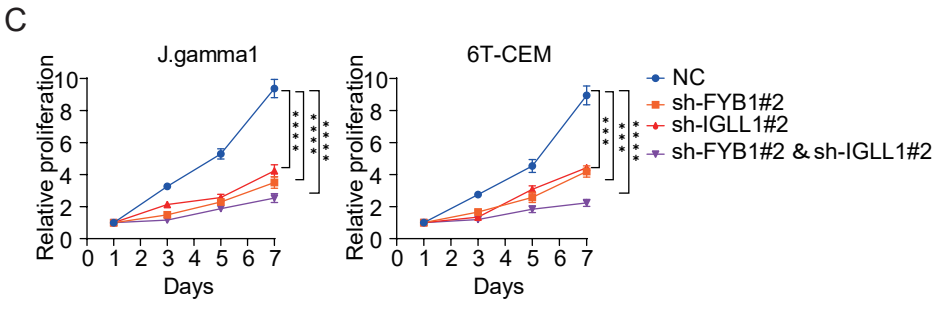

Supplement: f2 [file 3804605.f2.pdf]
